# Supplementary material for: Mediterranean Diet, Vitamin D, and Hypercaloric, Hyperproteic Oral Supplements for Treating Sarcopenia in Patients with Heart Failure—A Randomized Clinical Trial
Source: MDPI journal article supplement (doi:10.3390/nu16010110), 2023-12-28
Supplement: s1 [file s1]

Table S1. Composition for 100 ml of the standard hypercaloric hyperproteic oral supplement.

| Characteristics                    | Standard OS |
|------------------------------------|-------------|
| <b>Kcal</b>                        | 141         |
| <b>Energetic density (Kcal/mL)</b> | 1.4         |
| <b>Fat (g)</b>                     | 5.5         |
| Saturated (g)                      | 1.3         |
| Monounsaturated (g)                | 2.6         |
| Polyunsaturated (g)                | 1.6         |
| Omega-6 fatty acids (g)            | 0.96        |
| Omega-3 fatty acids (g)            | 0.52        |
| EPA+DHA (mg)                       | 385         |
| <b>Carbohydrates (g)</b>           | 14.5        |
| Sugar (g)                          | 0.86        |
| <b>Fiber (g)</b>                   | 1.7         |
| <b>Proteins (g)</b>                | 7.4         |
| <b>Osmolality (mOsm/L)</b>         | 255-375     |
